# Supplementary material for: Fiber Optic Particle Plasmon Resonance Biosensor for Label-Free Detection of Nucleic Acids and Its Application to HLA-B27 mRNA Detection in Patients with Ankylosing Spondylitis
Source: MDPI journal article supplement (doi:10.3390/s20113137), 2020-06-01
Supplement: s1 [file s1]

## Supplementary Material

# Fiber Optic Particle Plasmon Resonance Biosensor for Label-Free Detection of Nucleic Acids and Its Application to HLA-B27 mRNA Detection in Patients with Ankylosing Spondylitis

Yen-Ta Tseng <sup>1,†</sup>, Wan-Yun Li <sup>1,†</sup>, Ya-Wen Yu <sup>1,†</sup>, Chang-Yue Chiang <sup>1,4</sup>, Su-Qin Liu <sup>2</sup>, Lai-Kwan Chau <sup>1,\*</sup>, Ning-Sheng Lai <sup>2,\*</sup>, Cheng-Chung Chou <sup>3,\*</sup>

<sup>1</sup> Department of Chemistry and Biochemistry and Center for Nano Bio-Detection, National Chung Cheng University, Chiayi 62102, Taiwan; tsengyentaozzy@gmail.com (Y.T.T.); smilelili72@gmail.com (W.Y.L.); wen19860312@hotmail.com (Y.W.Y.)

<sup>2</sup> Immunology and Rheumatology, Department of Medicine, Buddhist Dalin Tzu Chi General Hospital, Chiayi 62247 Taiwan; df897226@tzuchi.com.tw (S.Q.L.)

<sup>3</sup> Department of Biomedical Sciences, National Chung Cheng University, Chiayi 62102, Taiwan

<sup>4</sup> Graduate School of Engineering Science and Technology, National Yunlin University of Science and Technology, Yunlin 64002, Taiwan; chiangcy@yuntech.edu.tw (C.-Y.C.)

\* Correspondences: chelkc@ccu.edu.tw (L.K.C.); Q12015@tzuchi.com.tw (N.S.L.); biocccc@ccu.edu.tw (C.C.C.)

Tel.: +886-5-2729377 (L.K.C.); +886-5-264-8000 ext. 5003 (N.S.L.); +886-5-2720411 ext. 66506 (C.C.C.)

<sup>†</sup> These authors contributed equally to this work.

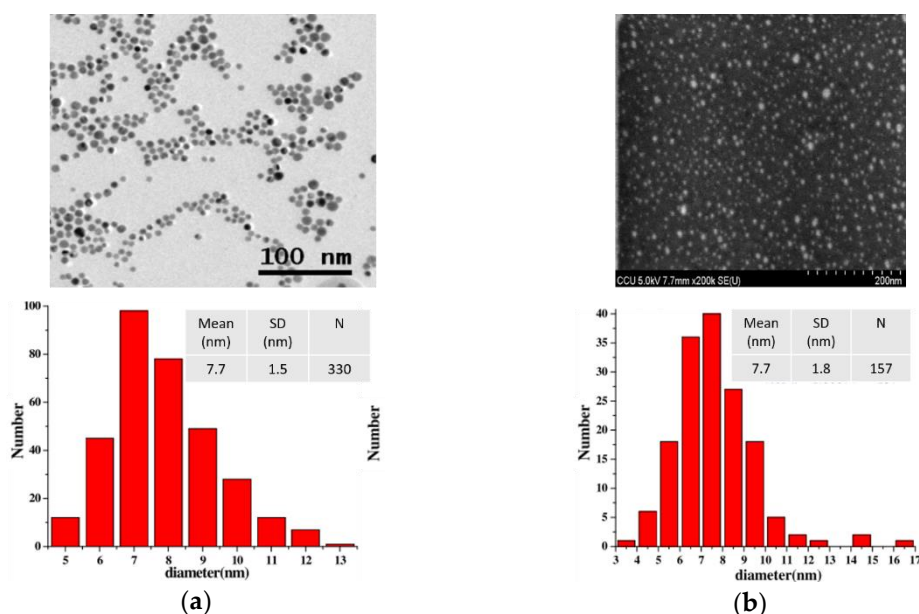

**Figure S1.** AuNP images obtained from electron microscopy. (a) A TEM image of synthesized AuNPs, the mean size of AuNPs is  $7.7 \pm 1.5$  nm. (b) A SEM image of AuNPs on an optical fiber, the mean size of AuNP is  $7.7 \pm 1.8$  nm.

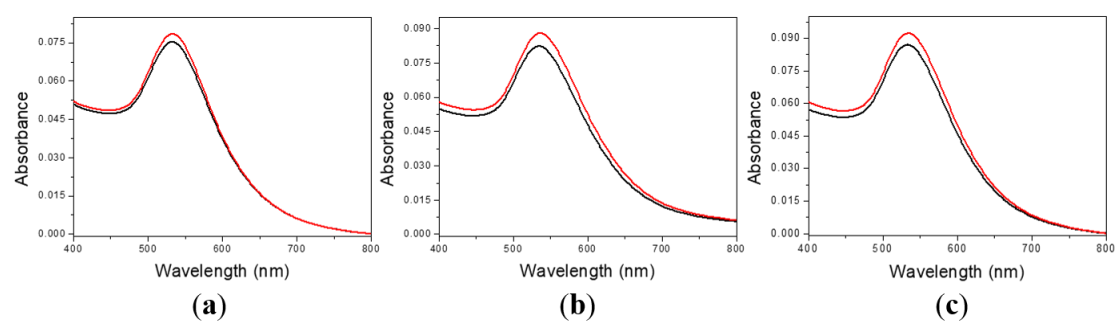

**Figure S2.** UV-visible spectra of thiolated ssDNA/MCE-modified AuNPs on glass slides before (black line) and after (red line) DNA hybridization with MCE reaction time at (a) 70 s; (b) 5 min; and (c) 1 h.

**Table S1.** Normalized absorbances of thiolated ssDNA/MCE-modified AuNPs on glass slides before and after DNA hybridization at 532 nm with various MCE reaction times.

| MCE time     | Before hybridization | After hybridization | $A_h/A_0$   |
|--------------|----------------------|---------------------|-------------|
| 70 s         | 0.075                | 0.078               | 1.04        |
| <b>5 min</b> | <b>0.076</b>         | <b>0.081</b>        | <b>1.06</b> |
| 1 h          | 0.087                | 0.092               | 1.06        |
